# Supplementary material for: Comprehensive analysis of lncRNAs and mRNAs in skeletal muscle of rainbow trout (Oncorhynchus mykiss) exposed to estradiol
Source: PubMed Central journal article supplement (PMC5603547; doi:10.1038/s41598-017-12136-6), 2017-09-18
Supplement: 41598_2017_12136_MOESM1_ESM.pdf [file 41598_2017_12136_MOESM1_ESM.pdf]

**Manuscript Title:** Comprehensive analysis of lncRNAs and mRNAs in skeletal muscle of rainbow trout (*Oncorhynchus mykiss*) exposed to estradiol

**Authors:** Jian Wang, Prasanthi P. Koganti, Jianbo Yao, Shuo Wei and Beth Cleveland

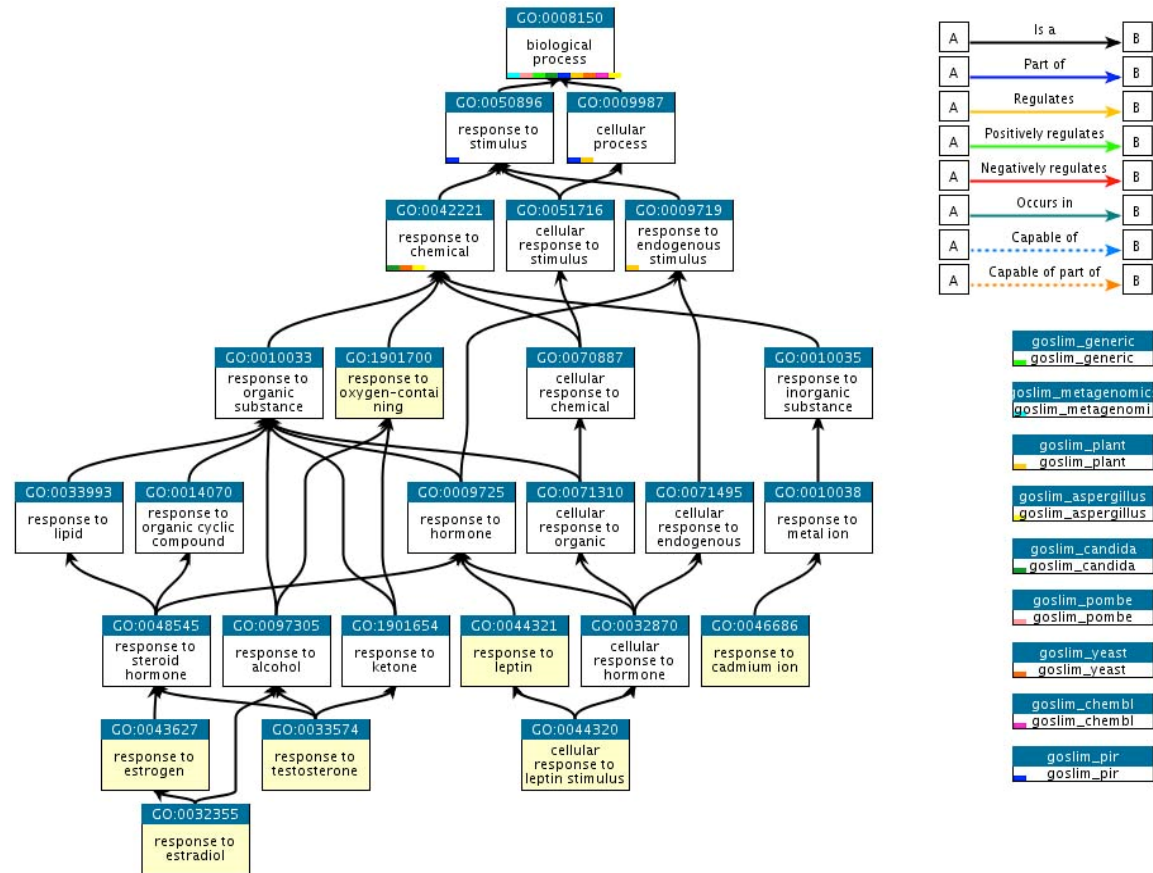

**Supplemental Figure S1.** Directed acyclic graph (DAG) of over-represented and hormone response associated GO terms.

**Manuscript Title:** Comprehensive analysis of lncRNAs and mRNAs in skeletal muscle of rainbow trout (*Oncorhynchus mykiss*) exposed to estradiol  
**Authors:** Jian Wang, Prasanthi P. Koganti, Jianbo Yao, Shuo Wei and Beth Cleveland

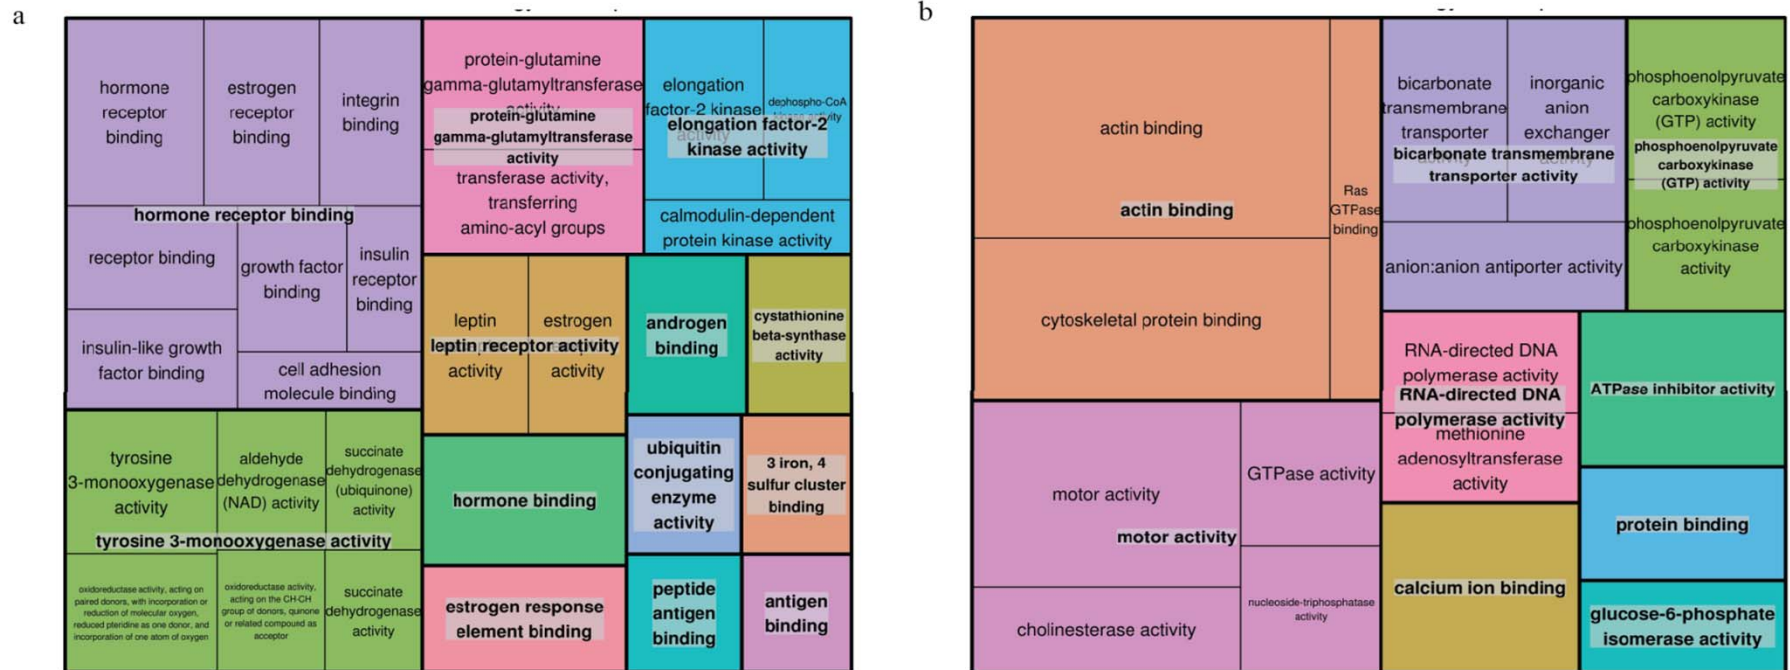

**Supplemental Figure S2. GO analysis of differentially expressed mRNAs.**

(a) Treemap of up-regulated representative GO terms in MF. (b) Treemap of down-regulated representative GO terms in MF. MF represents molecular function.

**Manuscript Title:** Comprehensive analysis of lncRNAs and mRNAs in skeletal muscle of rainbow trout (*Oncorhynchus mykiss*) exposed to estradiol

**Authors:** Jian Wang, Prasanthi P. Koganti, Jianbo Yao, Shuo Wei and Beth Cleveland

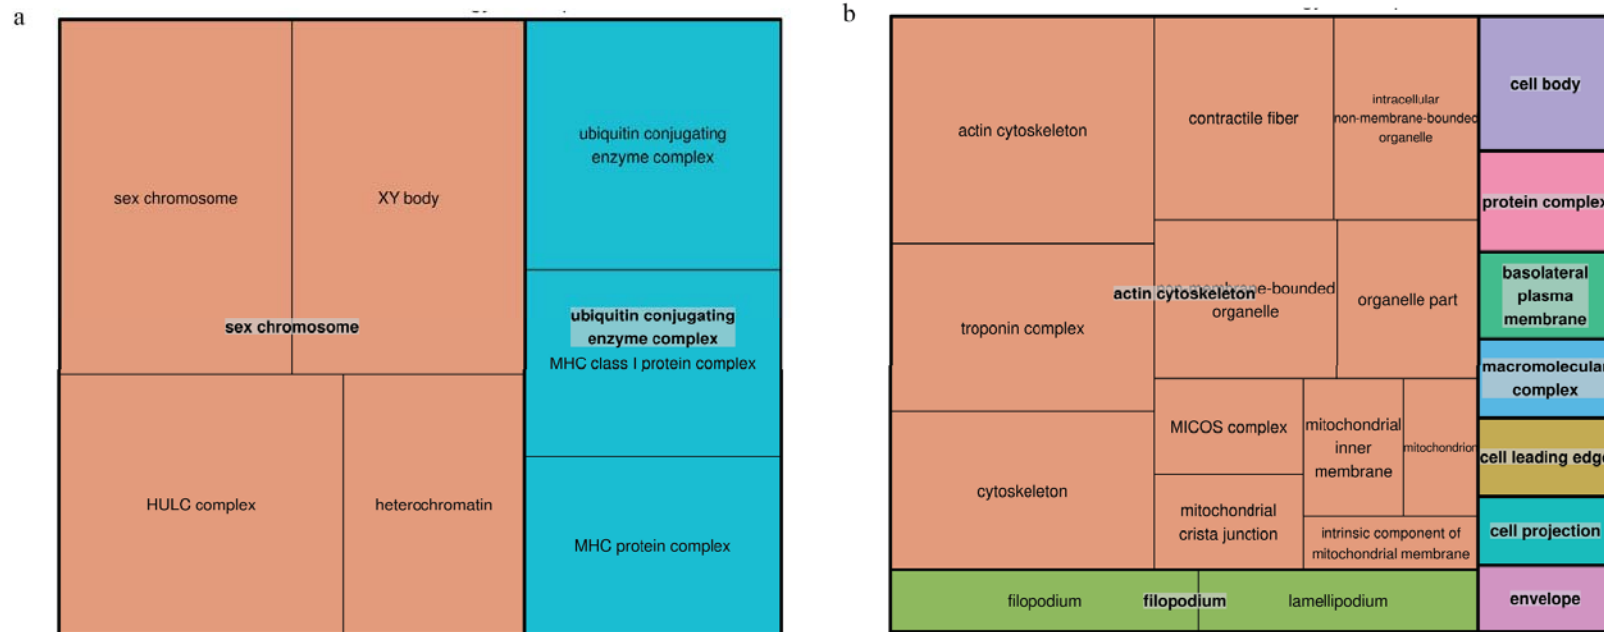

**Supplemental Figure S3. GO analysis of differentially expressed mRNAs.**

**(a)** Treemap of up-regulated representative GO terms in CC. **(b)** Treemap of down-regulated representative GO terms in CC. CC indicates cellular component.
